# Supplementary figures and images for: Hierarchical regulation of mRNA partitioning between the cytoplasm and the endoplasmic reticulum of mammalian cells
Source: PubMed Central journal article supplement — Mol Biol Cell. 2011 Jul 15;22(14):2646–58. doi: 10.1091/mbc.E11-03-0239 (PMC3135488; doi:10.1091/mbc.e11-03-0239), 2011-07-15

Figure S1. Chen et al.

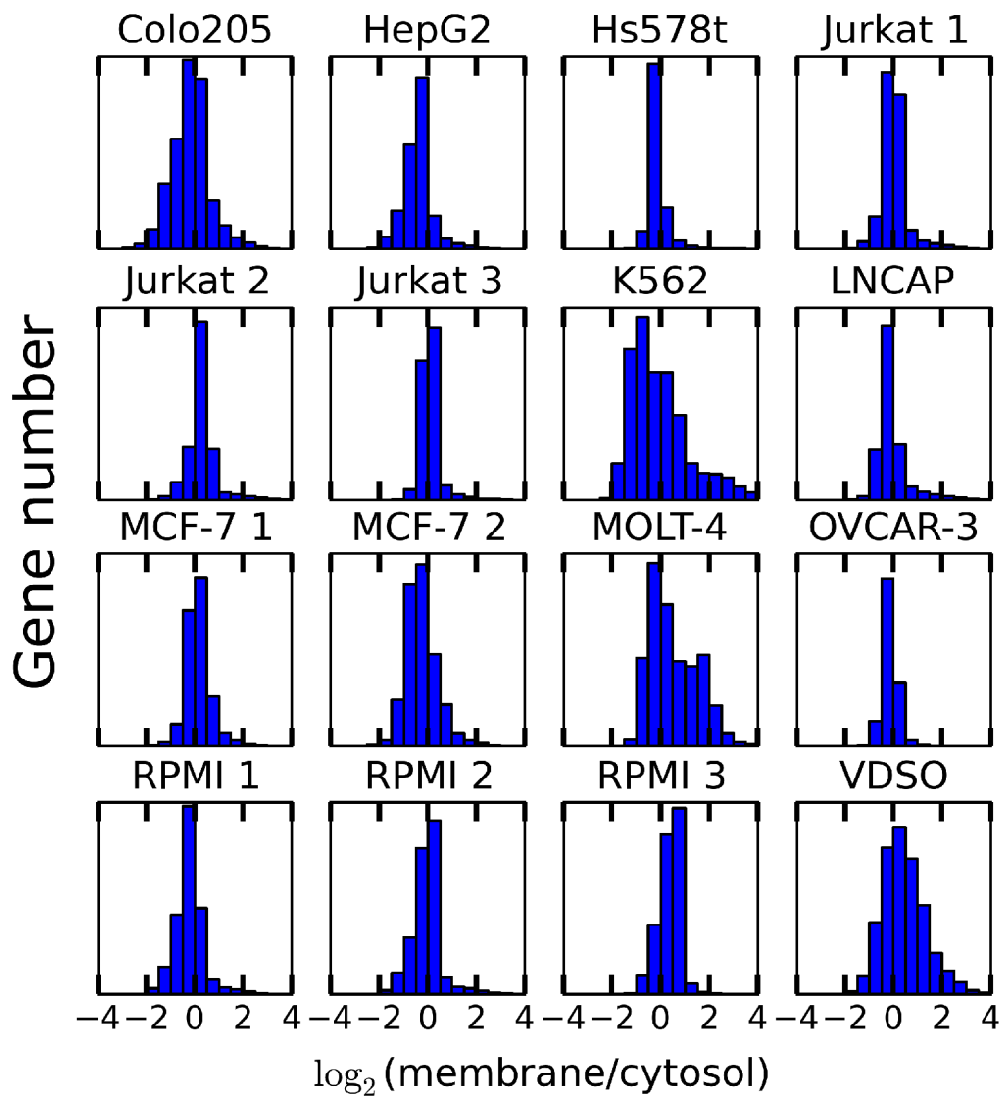

Supplement: E11-03-0239_1.pdf [file E11-03-0239_1.pdf]
